# Supplementary material
Source: PubMed Central journal article supplement (PMC6292508)
Supplement: NIHMS80463-supplement-Appendix_Tables.pdf [file NIHMS80463-supplement-Appendix_Tables.pdf]

## **Rab22A recruits BLOC-1 and BLOC-2 to promote the biogenesis of recycling endosomes**

Saurabh Shakya<sup>1</sup>, Prerna Sharma<sup>1\*</sup>, Anshul Milap Bhatt<sup>1\*</sup>, Riddhi Atul Jani<sup>2</sup>, Cédric Delevoye<sup>2,3</sup> and Subba Rao Gangi Setty<sup>1,†</sup>

<sup>1</sup>Department of Microbiology and Cell Biology, Indian Institute of Science, Bangalore, India 560012; <sup>2</sup>Structure and Membrane Compartments, Institut Curie, PSL Research University, CNRS, UMR 144, F-75005, Paris, France and <sup>3</sup>Cell and Tissue Imaging Facility (PICT-IBiSA), Institut Curie, PSL Research University, CNRS, UMR 144, F-75005, Paris, France.

‘\*’ Both authors contributed equally to this work.

†Corresponding author: subba@iisc.ac.in

### **Table of content**

| <b>Content</b>    | <b>Page number</b> |
|-------------------|--------------------|
| Appendix Table S1 | 2                  |
| Appendix Table S2 | 3                  |

## Appendix Tables

**Appendix Table S1.** List of TRC shRNA plasmids and their target sequences

| <b>Gene</b>   | <b>5'-Target sequence-3'</b>                                                                                                                                                                                                                  | <b>Gene</b>                    | <b>5'-Target sequence-3'</b>                                                                                                                        |
|---------------|-----------------------------------------------------------------------------------------------------------------------------------------------------------------------------------------------------------------------------------------------|--------------------------------|-----------------------------------------------------------------------------------------------------------------------------------------------------|
| <i>hRab4A</i> | sh1: GATAGAATGTGGCACTAAATC<br>sh2: CCTACAATGCGCTTACTAATC<br>sh3: TCCGTGACGAGAAGTTATTAC<br>sh4: GCTTACTTCATCAGTTTATTC                                                                                                                          | <i>hRab11A</i>                 | sh1: ATCATGCTGATAGTAACATTG<br>sh2: GCCTTATTGGTTTATGACATT                                                                                            |
| <i>hRab5A</i> | sh1: GGCAAGCAAGTCCTAACATTGC<br>sh2: CCAGGAATCAGTGTGTAGTAC<br>sh3: GCAGCCTTCCTTTCCAAAGTTC<br>sh4: GAGAGTCCGCTGTTGGCAAATC<br>sh5: CCATAGCCTAGCACCAATGTAC                                                                                        | <i>hRab14A</i>                 | sh1: CCTCACACAATTGGTGTGAA<br>sh2: GAAGCCAAACAGTTTGTGAA<br>sh3: GATGCAAGGAATCTCACCAATC<br>sh4: GTGTTGAATTTGGTACAAGAA                                 |
| <i>hRab5B</i> | sh1: GCCAGTCCTAGCATCGTTATT<br>sh2: GAAAGTCAAGCCTGGTATTAC<br>sh3: AGGTACAAGACAGCGACTTAC<br>sh4: GCAGATGACAACAGCTTATTG<br>sh5: GACCTGGCCAACAAACGTATG                                                                                            | <i>hRab22A</i>                 | sh1: GCAGCTATAATCGTTTATGAT<br>sh2: CCAAACATCAACCCAACAATA<br>sh3: CGCGATAAACATAAATGAACTC<br>sh4: CAGGTGTAGGTAAATCGAGTA<br>sh5: CAAGAACGATTTCTGCCTTA  |
| <i>hRab5C</i> | sh1: ATGCAGACGACAACAGTTTGC<br>sh2: CATTGCACTCGCGGGTAACA<br>sh3: CTTTGTCAAGGGACAGTTTC                                                                                                                                                          | <i>hMuted (BLOC-1 subunit)</i> | sh1: GCTCAGAGAACTGTAGGTATA<br>sh2: CCACTTAGTAGCTAGTGAGAA<br>sh3: GTAGCTAGTGAGAAACAGCAT<br>sh4: GCAGCTAATGACTCAGTCTGT                                |
| <i>hRab7A</i> | sh1: ATGGATAAATTGCCGTTATTTTC<br>sh2: ACTGCTGCGTTCTGGTATTTG<br>sh3: GGCTAGTCACAATGCAGATAT<br>sh4: ACGAATTTCTGAACTTATCA<br>sh5: ACGTAGGCCTTCAACACAATTC<br>sh6: ACCAGTATGTGAATAAGAAAT<br>sh7: GGTTATCATCTGGGAGATTC<br>sh8: ATAGCTGGAGAGATGAGTTTC | <i>hHPS6 (BLOC-2 subunit)</i>  | sh1: TCACTGACACAGGAAATCATT<br>sh2: GCTTGGTCTCTCCTACAGTAA<br>sh3: GAGGGAATCTTCGTCTGCTTTC<br>sh4: GCCCATATGAGGACATCCTAT<br>sh5: GCTTCGAAGTGAAATCTTCAA |
| <i>hRab9A</i> | sh1: GACAACGGCGACTATCCTTAT<br>sh2: CCGAGGATAGGTCAGATCATT                                                                                                                                                                                      |                                |                                                                                                                                                     |

**Appendix Table S2.** List of primers used for transcript analysis

| Gene                          | Forward and reverse primers                                                    | Amplicon size (bp) |
|-------------------------------|--------------------------------------------------------------------------------|--------------------|
| <b>Human specific primers</b> |                                                                                |                    |
| <i>hGAPDH</i>                 | 5'-AGTCCACTGGCGTCTTCAC-3'<br>5'-GCTGATGATCTTGAGGCTGT-3'                        | 155                |
| <i>hRab4A</i>                 | 5'-ATCGCGGCCGCATGTCGCAGACGGCCATG-3'<br>5'-CTTCTCGAGCTAACAAACCACACTCCTG-3'      | 657                |
| <i>hRab5A</i>                 | 5'-GGAAGATCTATGGCTAGTCGAGGCGCAA-3'<br>5'-CGCGTCGACTTAGTTACTACAACACTGA-3'       | 648                |
| <i>hRab5B</i>                 | 5'-GGCCATGACTAGCAGAAGTACA-3'<br>5'-AACCTCAGTTGCTACAACACTG-3'                   | 648                |
| <i>hRab5C</i>                 | 5'-ATACATGGCGGGTTCGAGGAGGT-3'<br>5'-AGCCTCAGTTGCTGCAGCACTG-3'                  | 651                |
| <i>hRab7A</i>                 | 5'-AAGGATGACCTCTAGGAAGAAA-3'<br>5'-AGGCTCAACAACACTGCAGCTTTC-3'                 | 620                |
| <i>hRab9A</i>                 | 5'-TGGAGATGGTGGAGTTGGGA-3'<br>5'-GCAGCAGTCAGAACCTCTGT-3'                       | 211                |
| <i>hRab11A</i>                | 5'-GGAAGATCTATGGGCACCCGCGACGACGA-3'<br>5'-CGCGTCGACTTAGATGTTCTGACAGCACT-3'     | 651                |
| <i>hRab14A</i>                | 5'-CGTGAATTCATGGCAACTGCACCATAACAAC-3'<br>5'-ACGCGGATCCCTAGCAGCCACAGCCTTCTCT-3' | 648                |
| <i>hRab22A</i>                | 5'-ATGGCGCTGAGGGAGCTC-3'<br>5'-TCAGCAGCAGCTCCGCTT-3'                           | 585                |
| <b>Mouse specific primers</b> |                                                                                |                    |
| <i>mGAPDH</i>                 | 5'-GAGCCAAACGGGTCATCATCT-3'<br>5'-GAGGGGCCATCCACAGTCTT-3'                      | 220                |
| <i>mRab22A</i>                | 5'-GCCGCTCGAGATGGCGCTGAGGGAACTT-3'<br>5'-AGGGAAGCTTTCAGCAGCAGCTTCGCTT-3'       | 585 bp             |
