# Supplementary material
Source: PubMed Central journal article supplement (PMC6292508)
Supplement: NIHMS80463-supplement-Supple_Figures.pdf [file NIHMS80463-supplement-Supple_Figures.pdf]

## Expanded View Figures

### Figure EV1. Analysis of endosomal Rab RNAi screen and the localization of Rabs to REs.

- A IFM images of HeLa cells to study the localization of KIF13A-YFP to REs.
- B PCR analysis of Rab-knockdown HeLa cells to measure the knockdown efficiency of each shRNA as indicated. DNA band intensities were quantified and indicated on the gels.
- C Subcellular fractionation of HeLa cells to study the localization of different Rabs (red box) with respect to STX13 or AP-1.
- D, E IFM analysis of HeLa cells that were transfected with different constructs as indicated.
- F Live cell imaging of mCherry-Rab22A with respect to GFP-Rab9A in HeLa cells. Arrowheads point to the Rab22A-positive tubular structures. Magnified view of insets (at 0, 16, 40 s) are shown separately. Scale bars: 10  $\mu$ m.
- G IFM images of Rab22A sh, BLOC-1 sh and control sh HeLa cells that were transfected with indicated constructs.
- H Graphs represent the measurement of corrected total cell fluorescence (CTCF) in HeLa cells of Fig 2A.  $n = 6-8$  cells. Average CTCF values (AU: arbitrary units) and their respective fold changes (mean  $\pm$  SEM) are indicated.

Data information: In (A), arrowheads and arrows point to the KIF13A-positive tubular REs and E/SEs, respectively. In (D, E, G), arrowheads point to the STX13- or KIF13A-positive tubular REs or E/SEs. Scale bars: 10  $\mu$ m.

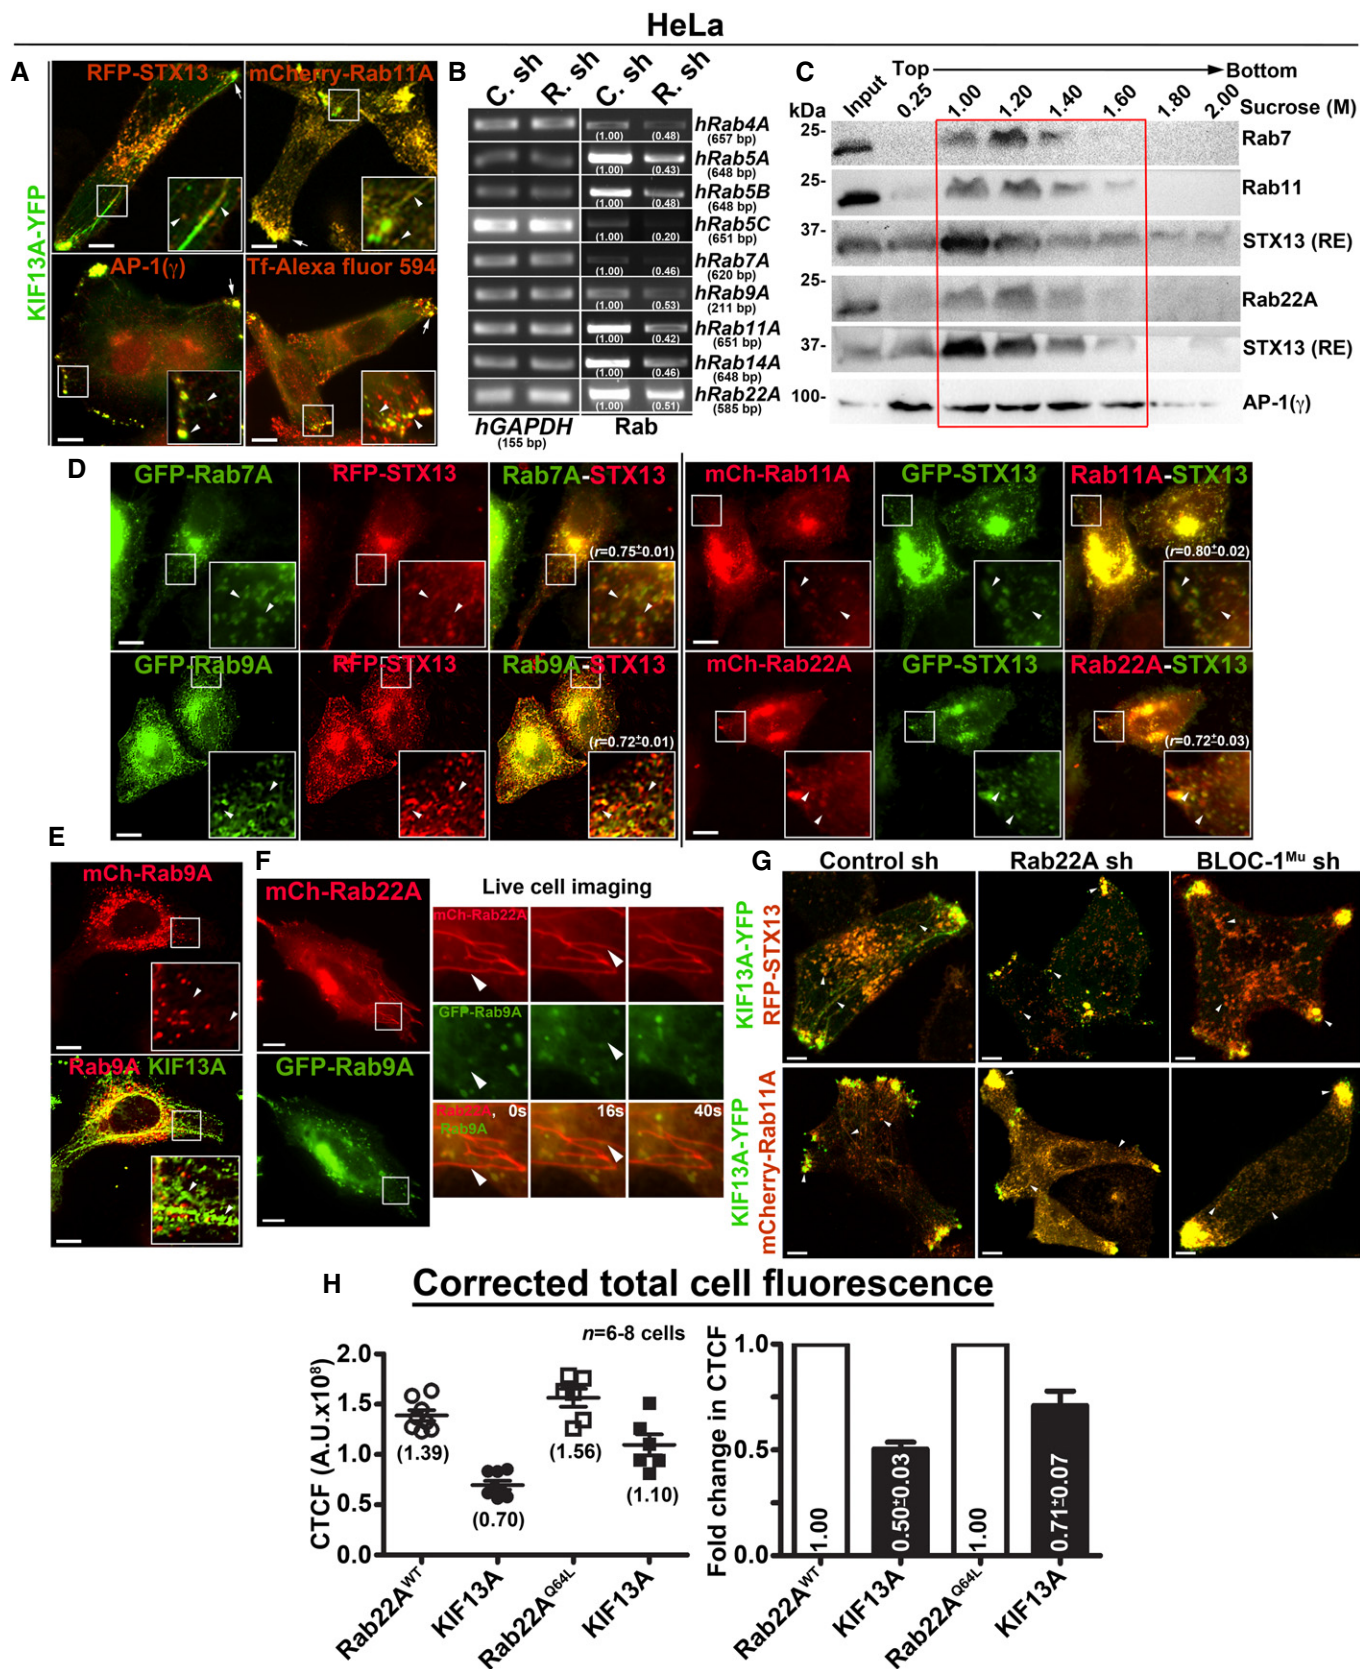

Figure EV1.

**Figure EV2. Analysis of mouse melanocytes expressing different constructs of Rab22A.**

- A Live cell imaging of mCherry-Rab22A with respect to GFP-STX13 in wild-type melanocytes. Arrows point to Rab22A-positive buds or tubular structures arising from STX13-positive E/SEs (arrowheads). Magnified view of insets (at various seconds) is shown separately. Scale bars: 10  $\mu$ m.
- B IFM analysis of mCherry-Rab22A<sup>WT/Q64L/S19N</sup>-transfected melanocytes. Arrowheads point to Rab22A localization, and arrows indicate the melanocyte pigmentation. Nuclei are stained with Hoechst 33258. The colocalization coefficient ( $r$ , in mean  $\pm$  SEM) between two markers was indicated separately. Scale bars: 10  $\mu$ m.
- C, D Quantification of melanin content (C,  $n = 5$ ) and the protein levels of TYRP1 (judged by immunoblotting in D,  $n = 3$ ) in melanocytes that were transfected with GFP-Rab22A<sup>WT/Q64L/S19N</sup>. In (D), graph indicates the relative levels (mean  $\pm$  SEM) of TYRP1 with respect to overexpressed Rab22A. Protein band intensities were quantified and indicated on the gels. \*\* $P \leq 0.01$ , \*\*\* $P \leq 0.001$  and ns = not significant (unpaired Student's t-test).

## Melanocytes

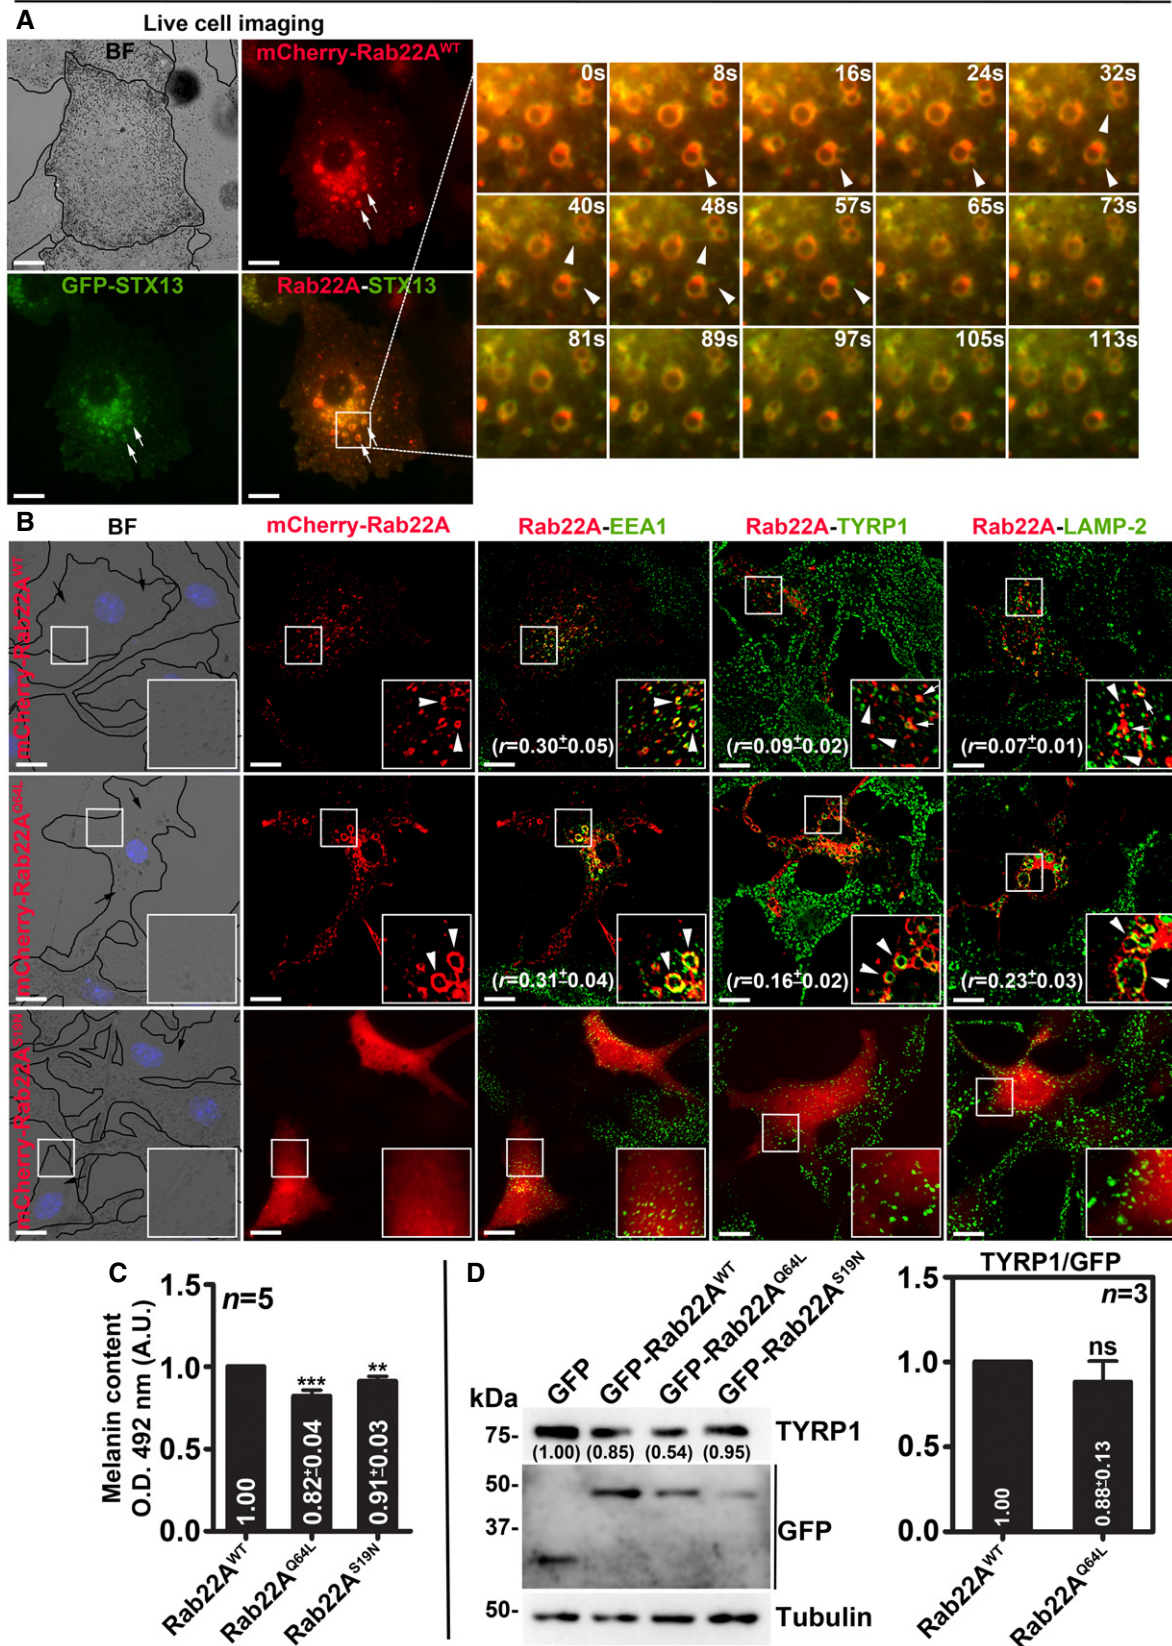

Figure EV2.

**Figure EV3. Analysis of cargo recycling in control and Rab22A-, BLOC-1-, BLOC-2-knockdown HeLa cells.**

- A IFM images of KIF13A-YFP-transfected control and knockdown HeLa cells as indicated. Arrowheads point to the localization of KIF13A to E/SEs or REs.
- B Membrane-cytosol fractionation of HeLa cell homogenate for the localization of KIF13A. \*, non-specific bands.
- C IFM images of control and Rab22A-, BLOC-1-knockdown HeLa cells that were stained with LAMP-2 or internalized with fluorescein-dextran.
- D Cell surface levels of LAMP-1 and M6PR in control and Rab22A-, BLOC-1-knockdown HeLa cells measured using flow cytometry. Normalized mean fluorescence intensity (MFI) was calculated (mean  $\pm$  SEM) and then plotted.  $n = 3$ .
- E IFM images of HeLa cells that were subjected to Tf-Alexa Fluor 594 recycling kinetics.
- F Fluorescence intensities Tf in the images of (E) were quantified and plotted (mean  $\pm$  SEM).  $n = 3$ .  $n_c$  = total number of cells.
- G Immunoblotting analysis of Tf receptor in HeLa cells as indicated. Protein band intensities were quantified and indicated on the gels.

Data information: In (A, C, E), arrows point to the localization of cytoskeletal proteins (A) or internalized dextran or lysosomes (C) or accumulation of Tf to the intracellular vesicles (E). Scale bars: 10  $\mu$ m. In (D, F), \* $P \leq 0.05$ , \*\* $P \leq 0.01$ , \*\*\* $P \leq 0.001$  and ns = not significant (unpaired Student's *t*-test).

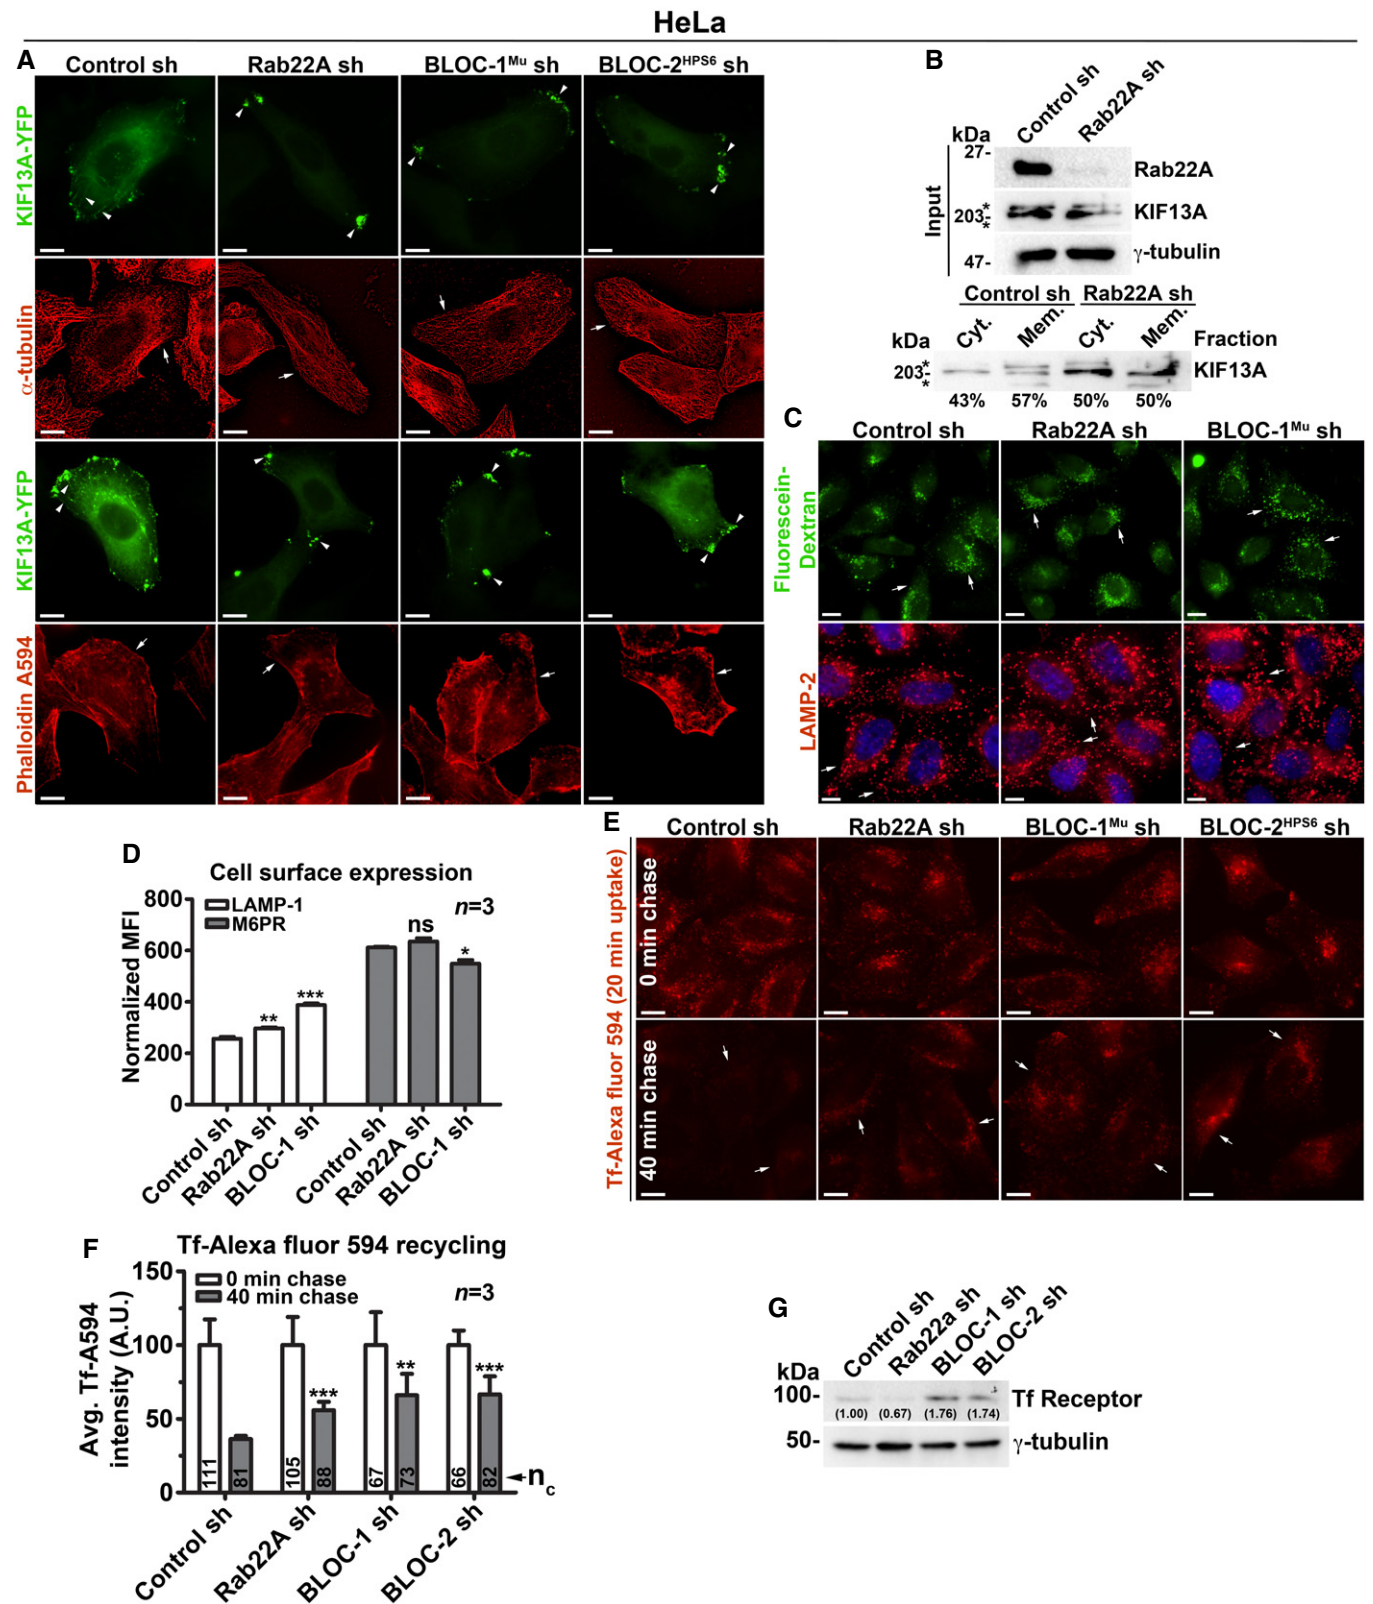

Figure EV3.

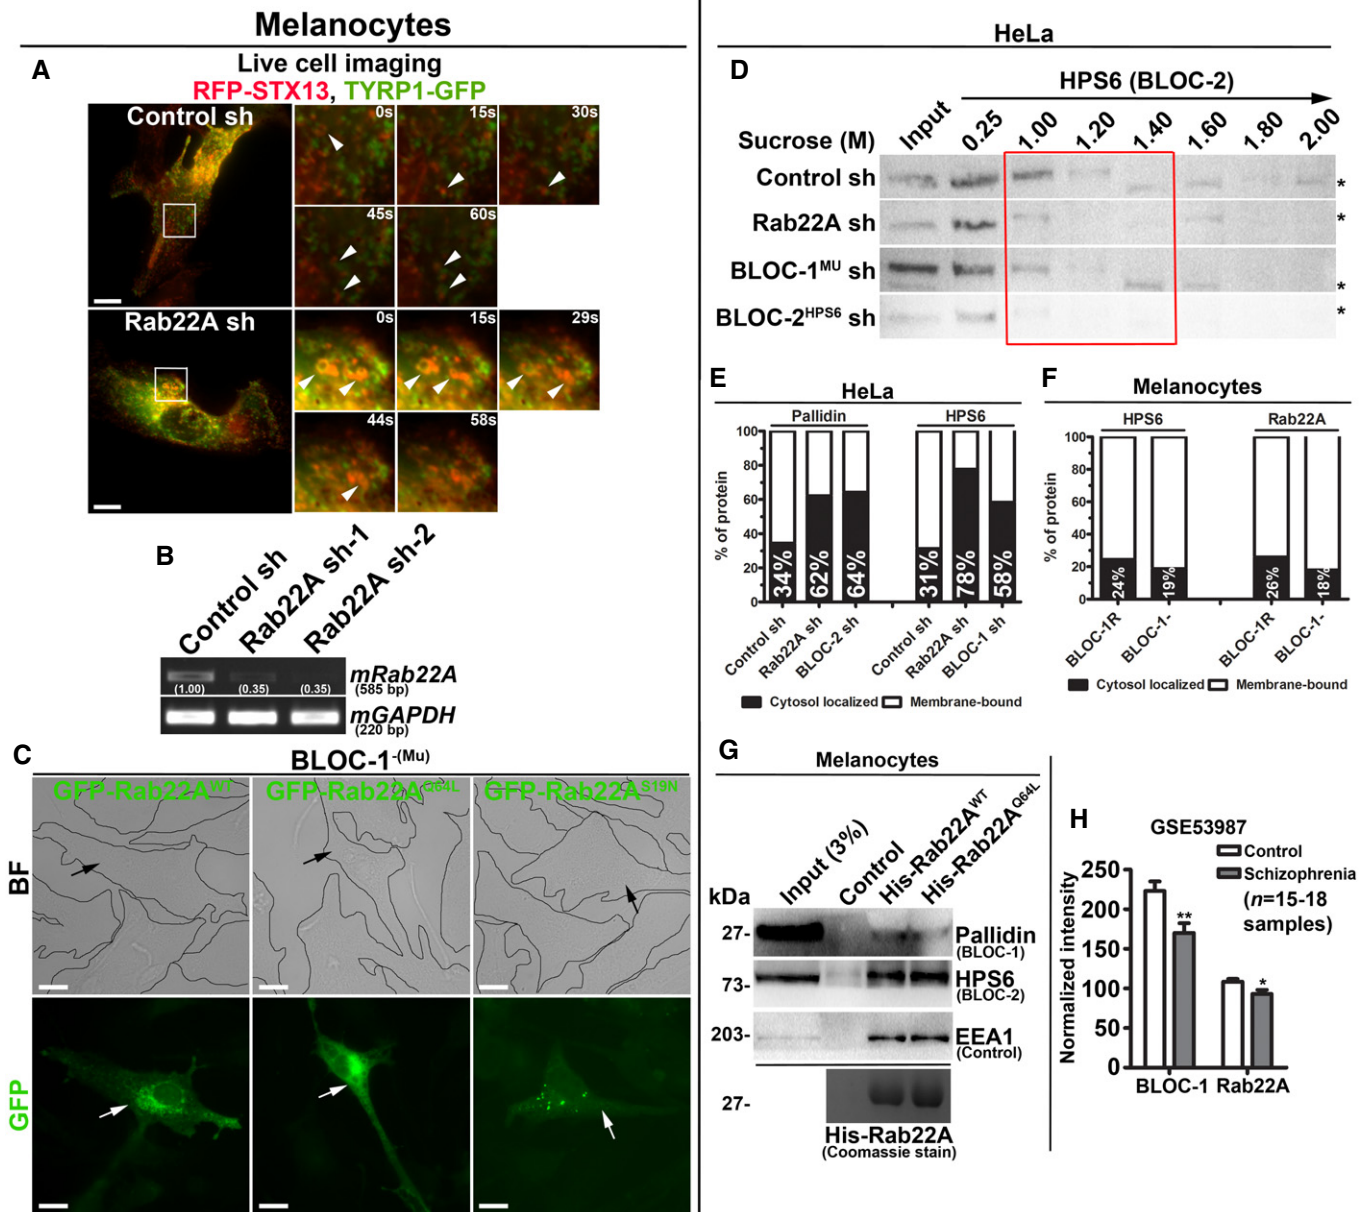

**Figure EV4.** Analysis of Rab22A-knockdown and BLOC-1-deficient melanocytes expressing different constructs and membrane association and interaction studies of Rab22A. Rab22A as possible susceptible gene for schizophrenia.

- A Live cell imaging of TYRP1-GFP with respect to RFP-STX13 in control and Rab22A-depleted melanocytes. Arrowheads point to TYRP1-positive structures. Magnified view of insets (at various seconds) is shown separately. Scale bars: 10  $\mu$ m.
- B PCR analysis of Rab22A-depleted melanocytes. DNA band intensities were quantified and indicated on the gels.
- C BF and IFM images of GFP-Rab22A<sup>WT/Q64L/S19N</sup>-transfected BLOC-1-deficient melanocytes. Black and white arrows indicate the melanocyte pigmentation and GFP-Rab22A expression, respectively. Scale bars: 10  $\mu$ m.
- D Subcellular membrane fractionation of control and knockdown HeLa cells. The fractions were probed for HPS6 (red box).
- E, F Graphs represent the percentage of membrane association of pallidin or HPS6 or Rab22A in the indicated cell types and derived from Fig 5B and C, respectively.  $n = 1$ .
- G Pull-down of His-Rab22A<sup>WT/Q64L</sup> using melanocyte lysate. The bead-bound His-Rab22A was shown as coomassie-stained gel separately.
- H Transcript levels of Rab22A and pallidin (BLOC-1) in control and schizophrenia patients. Analysed from data set GSE53987 and then plotted (mean  $\pm$  SEM).  $n = 15-18$  samples. \* $P \leq 0.05$  and \*\* $P \leq 0.01$  (unpaired Student's t-test).
